# Supplementary material for: Production and isolation of pH sensing materials by carbonate melt oxidation of iridium and platinum
Source: Royal Society of Chemistry journal article supplement (doi:10.1039/c2jm16791c), 2012-01-01
Supplement: c2jm16791c.pdf [file c2jm16791c.pdf]

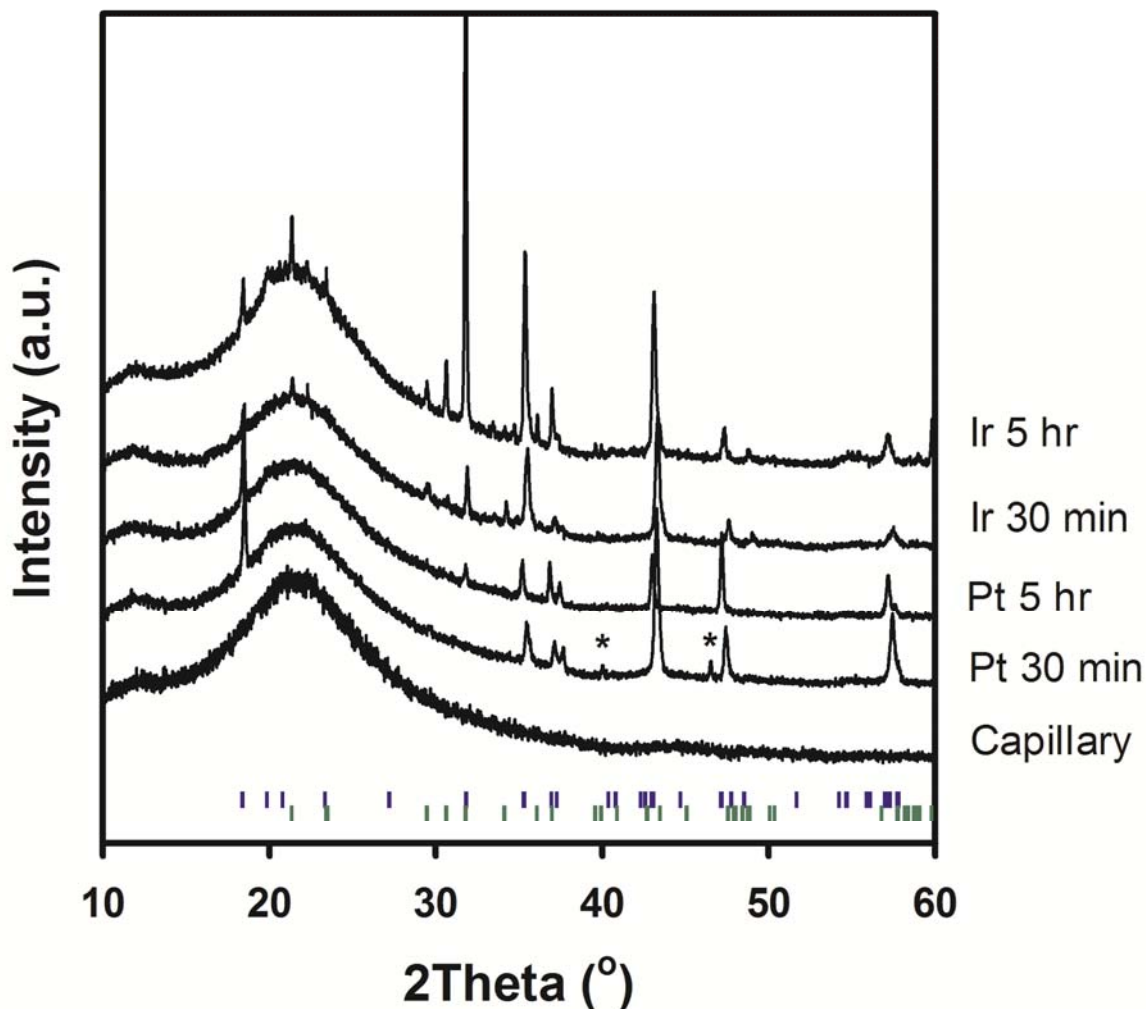

**Figure S1.** X-ray diffraction patterns for platinum wire and iridium wire annealed in forming gas and  $\text{Li}_2\text{CO}_3$  melt oxidized for 30 minutes and 5 hours, respectively; followed by 48 hour treatment with  $\sim 3\text{M}$   $\text{HNO}_3$ . XRD pattern of empty 0.8 mm capillary is also provided for comparison. Tick marks indicate the Bragg reflection positions for  $\text{Li}_2\text{CO}_3$  (green) and  $\text{Li}_2\text{MO}_3$  (blue), while asterisks indicate Bragg reflection positions for Pt.
